# Supplementary material for: On the limits of tuning comonomer affinity of ‘Spaleck-type’ ansa-zirconocenes in ethene/1-hexene copolymerization: a high-throughput experimentation/QSAR approach
Source: Royal Society of Chemistry journal article supplement (doi:10.1039/d0dt01967d), 2020-01-01
Supplement: d0dt01967d1.pdf [file d0dt01967d1.pdf]

## SUPPORTING INFORMATION

### On The Limits of Tuning Comonomer Affinity of ‘Spaleck-Type’ *ansa*-Zirconocenes in Ethene/1-Hexene Copolymerization: A High-Throughput Experimentation/QSAR Approach

*Christian Ehm,<sup>a,c,\*</sup> Antonio Vittoria,<sup>a,c</sup> Georgy P. Goryunov,<sup>b,c</sup> Vyatcheslav V. Izmer,<sup>b,c</sup> Dmitry S. Kononovich,<sup>b,c</sup> Oleg V. Samsonov,<sup>b,c</sup> Peter H. M. Budzelaar,<sup>a,c</sup> Alexander Z. Voskoboynikov,<sup>b,c</sup> Vincenzo Busico,<sup>a,c</sup> Dmitry V. Uborsky<sup>b,c,\*</sup> and Roberta Cipullo<sup>a,c,\*</sup>*

<sup>a</sup> Dipartimento di Scienze Chimiche, Università di Napoli Federico II, Via Cintia, 80126 Napoli, Italy.

<sup>b</sup> Department of Chemistry, Lomonosov Moscow State University, 1/3 Leninskie Gory, 119991 Moscow, Russia

<sup>c</sup> DPI, P.O. Box 902, 5600 AX Eindhoven, the Netherlands.

### Contents

|                                                                                          |    |
|------------------------------------------------------------------------------------------|----|
| 1. Polymerization Details.....                                                           | 2  |
| <b>Table S1.</b> Polymerization Times , Yields and Catalysts Amounts. ....               | 4  |
| <b>Table S2.</b> Full Polymer Characterization.....                                      | 8  |
| 2. QSAR Modeling.....                                                                    | 13 |
| QSAR Modeling – Determination of Gibbs Free Energy Differences.....                      | 14 |
| QSAR Modeling – $r_E$ model .....                                                        | 16 |
| QSAR Modeling – $r_E$ model, Analysis of Variance .....                                  | 18 |
| QSAR Modeling – $r_E$ model, Leave-One-Out Analysis.....                                 | 19 |
| QSAR Modeling – $r_H$ model .....                                                        | 20 |
| QSAR Modeling – $r_H$ model, Analysis of Variance.....                                   | 22 |
| QSAR Modeling – $r_H$ model, Leave-One-Out Analysis.....                                 | 23 |
| 3. Lack of Correlation between Performance Indicators in Homo- and Copolymerization..... | 24 |
| 4. Full Gaussian Citation .....                                                          | 26 |

## 1. Polymerization Details

Prior to the execution of a polymerization library, the PPR modules undergo 'bake-and-purge' cycles overnight (8 h at 90-140°C with intermittent dry N<sub>2</sub> flow), to remove any contaminants and left-overs from previous experiments. After cooling to glove-box temperature, the module stir tops are taken off, and the 48 cells are fitted with disposable 10 mL glass inserts (pre-weighed in a Mettler-Toledo Bohdan Balance Automator) and polyether ether ketone (PEEK) stir paddles. The stir tops are then set back in place, and the cells are loaded with the appropriate amounts of toluene solvent, comonomer (see Table S1) and triisobutylaluminum (TIBA, 5 μmol) scavenger, thermostated at 60 °C, and brought to 4.5 bar of pressure with ethene. At this point, the catalyst injection sequence is started; aliquots of (a) a toluene 'chaser', (b) a toluene solution of catalyst (variable amount, see Table S1), (c) a toluene solution of the activator (HNMe<sub>2</sub>Ph<sup>+</sup>[B(C<sub>6</sub>F<sub>5</sub>)<sub>4</sub>]<sup>-</sup> or [Ph<sub>3</sub>C<sup>+</sup>] [B(C<sub>6</sub>F<sub>5</sub>)<sub>4</sub>]<sup>-</sup>, the first one was used in 2-fold excess with respect to catalyst, the second one was used in 10-fold excess), (d) a toluene 'buffer', all separated by nitrogen gaps, are uploaded into the slurry needle and subsequently injected into the cell of destination, thus starting the reaction. This is left to proceed under stirring (800 rpm) at constant temperature and pressure with continuous feed of ethene on demand until the desired monomer consumption has been reached (for reaction time, see Table S1), and quenched by over-pressurizing the cell with 50 psi (3.4 bar) of dry air (preferred over other possible catalyst quenchers because in case of cell or quench line leakage oxygen is promptly detected by the dedicated glove-box sensor). Once all cells have been quenched, the modules are cooled down and vented, the stir-tops are removed, and the glass inserts containing the reaction phases are taken out and transferred to a centrifugal evaporator (Genevac EZ-2 Plus or Martin Christ RVC 2-33 CDplus), where all volatiles are distilled out and the polymers are thoroughly dried overnight. Reaction yields are double-checked against on-line monomer conversion measurements by robotically weighing the dry polymers while still in the reaction vials, subtracting the pre-recorded tare. Polymer aliquots are then sent to the characterizations.

GPC curves were recorded with a Freeslate Rapid GPC setup, equipped with a set of two mixed-bed Agilent PLgel 10 μm columns and a Polymer Char IR4 detector. Calibration was performed with the universal method, using 10 monodisperse polystyrene samples (*M<sub>n</sub>* between 1.3 and 3700 kDa).

<sup>13</sup>C NMR spectra were recorded with a 100 MHz Bruker Avance III 400 spectrometer equipped with a 5 mm high-temperature cryoprobe. Polymer samples (~25 mg) were dissolved at 120 °C in tetrachloroethane-1,2-*d*<sub>2</sub> (0.5 mL) with 0.40 mg mL<sup>-1</sup> BHT (2,6-di-*tert*-butyl-4-methylphenol) as

stabilizer. DSC curves were obtained with a differential scanning calorimeter (DSC-822 by Mettler Toledo) in a flowing N<sub>2</sub> atmosphere at a scanning rate of 10 °C/min from 0 to 200 °C.

Table S1. Polymerization Times , Yields and Catalysts Amounts.

| Catalyst ID | nmol           | t <sub>p</sub> (s) | Yield (mg) |
|-------------|----------------|--------------------|------------|
| <b>M1</b>   | 20             | 582                | 106        |
|             | 20             | 878                | 102        |
|             | 20             | 758                | 109        |
|             | 20             | 1146               | 159        |
|             | 20             | 892                | 147        |
| <b>M2</b>   | 20             | 726                | 72         |
|             | 10             | 1201               | 41         |
|             | 30             | 876                | 94         |
|             | 30             | 815                | 99         |
| <b>M3</b>   | 20             | 962                | 48         |
|             | 20             | 1050               | 70         |
|             | 40             | 712                | 70         |
|             | 40             | 600                | 48         |
| <b>M4</b>   | 40             | 539                | 70         |
|             | 20             | 740                | 42         |
|             | 60             | 461                | 104        |
|             | 60             | 481                | 93         |
| <b>M5</b>   | 20             | 1183               | 84         |
|             | 20             | 1055               | 81         |
|             | 3 <sup>#</sup> | 612                | 59         |
|             | 3 <sup>#</sup> | 580                | 61         |
|             | 20             | 2036               | 104        |
| <b>M6</b>   | 30             | 1255               | 106        |
|             | 40             | 6031               | 42         |
|             | 20             | 5346               | 46         |
| <b>M7</b>   | 20             | 1455               | 31         |
|             | 20             | 943                | 25         |
|             | 20             | 3731               | 32         |
|             | 20             | 1264               | 26         |
| <b>M8</b>   | 10             | 2468               | 67         |
|             | 10             | 2409               | 73         |
|             | 10             | 3363               | 93         |
| <b>M9</b>   | 40             | 1191               | 55         |
|             | 20             | 1650               | 37         |
|             | 60             | 891                | 82         |
|             | 60             | 972                | 84         |
| <b>M10</b>  | 20             | 1083               | 80         |
|             | 20             | 1293               | 71         |
|             | 20             | 1411               | 102        |
|             | 25             | 1240               | 109        |

| Catalyst ID | nmol | t <sub>p</sub> (s) | Yield (mg) |
|-------------|------|--------------------|------------|
| <b>M11</b>  | 20   | 1139               | 79         |
|             | 20   | 1869               | 70         |
|             | 20   | 1468               | 82         |
|             | 20   | 1225               | 77         |
| <b>M12</b>  | 40   | 4268               | 58         |
|             | 20   | 5402               | 52         |
|             | 40   | 4894               | 105        |
|             | 40   | 5401               | 91         |
| <b>M13</b>  | 30   | 6733               | 78         |
|             | 30   | 4490               | 74         |
|             | 30   | 4512               | 88         |
|             | 30   | 6569               | 107        |
|             | 45   | 4891               | 110        |
| <b>M14</b>  | 20   | 7202               | 58         |
|             | 40   | 3267               | 71         |
|             | 40   | 5232               | 86         |
| <b>M15</b>  | 40   | 5003               | 62         |
|             | 40   | 2890               | 65         |
|             | 40   | 5402               | 68         |
|             | 40   | 2421               | 92         |
| <b>M16</b>  | 20   | 2722               | 64         |
|             | 20   | 5405               | 60         |
|             | 30   | 3555               | 101        |
|             | 30   | 5403               | 103        |
| <b>M17</b>  | 20   | 5402               | 24         |
|             | 40   | 6983               | 19         |
|             | 40   | 5401               | 32         |
| <b>M18</b>  | 20   | 1209               | 23         |
|             | 20   | 6983               | 35         |
|             | 20   | 5401               | 26         |
| <b>M19</b>  | 20   | 1872               | 55         |
|             | 20   | 1765               | 53         |
|             | 40   | 1121               | 102        |
|             | 40   | 995                | 86         |
| <b>M20</b>  | 5    | 399                | 56         |
|             | 5    | 853                | 55         |
|             | 5    | 1659               | 66         |
|             | 5    | 4459               | 81         |
| <b>M21</b>  | 40   | 6118               | 45         |
|             | 60   | 4068               | 50         |
|             | 60   | 3063               | 51         |
| <b>M22</b>  | 20   | 726                | 63         |
|             | 20   | 1233               | 91         |
|             | 20   | 2136               | 73         |
|             |      |                    |            |

| Catalyst ID | nmol            | t <sub>p</sub> (s) | Yield (mg) |
|-------------|-----------------|--------------------|------------|
| M23         | 20              | 1035               | 83         |
|             | 20              | 1634               | 69         |
| M24         | 30              | 7200               | 16         |
|             | 20              | 5405               | 19         |
|             | 40              | 5403               | 31         |
| M25         | 40              | 6623               | 25         |
|             | 40              | 5401               | 42         |
| M26         | 20              | 3366               | 65         |
|             | 20              | 5401               | 68         |
|             | 40              | 1920               | 139        |
|             | 40              | 5401               | 122        |
| M27         | 20              | 5426               | 75         |
|             | 40              | 2800               | 74         |
|             | 40              | 3380               | 117        |
|             | 60              | 2564               | 120        |
| M28         | 20              | 1521               | 64         |
|             | 10              | 1062               | 51         |
| M29         | 20              | 5666               | 58         |
|             | 20              | 5880               | 57         |
|             | 40              | 2656               | 81         |
| M30         | 45              | 3722               | 60         |
|             | 20              | 9228               | 60         |
|             | 40              | 5791               | 66         |
| M31         | 6               | 188                | 121        |
|             | 5               | 622                | 106        |
|             | 5               | 1104               | 53         |
|             | 8               | 240                | 110        |
|             | 6               | 325                | 163        |
| M32         | 20              | 1276               | 76         |
|             | 20              | 1440               | 65         |
|             | 20              | 1720               | 90         |
|             | 20              | 1984               | 87         |
| M33         | 10 <sup>#</sup> | 1201               | 71         |
|             | 10 <sup>#</sup> | 2586               | 47         |
|             | 40 <sup>#</sup> | 10015              | 66         |
| M34         | 35              | 1677               | 64         |
|             | 35              | 2387               | 64         |
|             | 35              | 3164               | 80         |
|             | 35              | 2229               | 84         |
| M35         | 5 <sup>#</sup>  | 938                | 61         |
|             | 35              | 4523               | 95         |
|             | 20              | 8742               | 89         |
|             | 8 <sup>#</sup>  | 354                | 128        |

| Catalyst ID | nmol | $t_p$ (s) | Yield (mg) |
|-------------|------|-----------|------------|
| <b>M36</b>  | 50   | 5400      | 51         |
|             | 40   | 6706      | 65         |
|             | 40   | 10801     | 36         |
|             | 40   | 7200      | 47         |
| <b>M37</b>  | 30   | 901       | 94         |
|             | 35   | 1343      | 84         |
|             | 30   | 998       | 110        |
|             | 20   | 3064      | 93         |
| <b>M38</b>  | 20   | 4049      | 65         |
|             | 20   | 3541      | 60         |
|             | 20   | 5466      | 88         |
|             | 20   | 6240      | 128        |
| <b>M39</b>  | 20   | 7201      | 46         |
|             | 20   | 4296      | 67         |
|             | 40   | 5640      | 108        |
| <b>M40</b>  | 40   | 8181      | 75         |
|             | 60   | 6036      | 79         |
|             | 20   | 11941     | 63         |
|             | 40   | 6964      | 78         |

#For these polymerizations, TTB was used as activator ( $[B]/[Zr] = 10$ ). See experimental details.

Table S2. Full Polymer Characterization.

| Catalyst ID | $v_H$ (mL) | $M_n^a$ | $M_w^a$ | PDI | $[E]/[H]_{av}^b$ | $[H], conv \%^c$ | $x_H^d$ | $p_{EE}^e$ | $p_{HH}^e$ | $r_E$ | $r_H$ |
|-------------|------------|---------|---------|-----|------------------|------------------|---------|------------|------------|-------|-------|
| M1          | 3.40       | 35      | 75      | 2.1 | 0.069            | 2.8              | 0.315   | 0.608      | 0.126      | 22.6  | 0.010 |
|             | 3.40       | 30      | 66      | 2.2 | 0.069            | 2.8              | 0.355   | 0.550      | 0.146      | 17.8  | 0.012 |
|             | 3.40       | 31      | 65      | 2.1 | 0.069            | 3.0              | 0.352   | 0.544      | 0.149      | 17.3  | 0.012 |
|             | 4.25       | 34      | 72      | 2.1 | 0.055            | 3.7              | 0.376   | 0.515      | 0.180      | 19.2  | 0.012 |
|             | 4.25       | 30      | 63      | 2.1 | 0.055            | 3.5              | 0.405   | 0.471      | 0.185      | 16.1  | 0.013 |
| M2          | 0.56       | 87      | 182     | 2.1 | 0.437            | 11.8             | 0.338   | 0.678      | 0.332      | 4.8   | 0.22  |
|             | 0.56       | 92      | 194     | 2.1 | 0.425            | 6.5              | 0.316   | 0.692      | 0.316      | 5.3   | 0.20  |
|             | 0.85       | 85      | 185     | 2.2 | 0.287            | 11.3             | 0.408   | 0.595      | 0.400      | 5.1   | 0.19  |
|             | 0.85       | 86      | 178     | 2.1 | 0.288            | 11.9             | 0.406   | 0.583      | 0.394      | 4.8   | 0.19  |
| M3          | 0.56       | 54      | 113     | 2.1 | 0.423            | 5.4              | 0.195   | 0.814      | 0.210      | 10.3  | 0.11  |
|             | 0.56       | 67      | 139     | 2.1 | 0.429            | 7.9              | 0.191   | 0.818      | 0.213      | 10.5  | 0.12  |
|             | 0.85       | 52      | 107     | 2.1 | 0.280            | 6.5              | 0.266   | 0.750      | 0.286      | 10.7  | 0.11  |
|             | 0.85       | 54      | 110     | 2.0 | 0.277            | 4.6              | 0.274   | 0.743      | 0.293      | 10.4  | 0.12  |
| M4          | 0.56       | 74      | 153     | 2.1 | 0.434            | 10.5             | 0.293   | 0.716      | 0.301      | 5.8   | 0.19  |
|             | 0.56       | 74      | 154     | 2.1 | 0.425            | 6.1              | 0.280   | 0.740      | 0.306      | 6.7   | 0.19  |
|             | 0.85       | 71      | 147     | 2.1 | 0.288            | 11.7             | 0.361   | 0.657      | 0.391      | 6.7   | 0.18  |
|             | 0.85       | 70      | 150     | 2.1 | 0.286            | 10.7             | 0.373   | 0.644      | 0.385      | 6.3   | 0.18  |
| M5          | 0.56       | 51      | 103     | 2.0 | 0.439            | 12.2             | 0.276   | 0.747      | 0.314      | 6.7   | 0.20  |
|             | 0.56       | 47      | 101     | 2.1 | 0.438            | 11.8             | 0.280   | 0.742      | 0.329      | 6.6   | 0.21  |
|             | 0.85       | 54      | 109     | 2.0 | 0.291            | 13.7             | 0.383   | 0.655      | 0.440      | 6.5   | 0.23  |
|             | 0.85       | 51      | 108     | 2.1 | 0.289            | 12.2             | 0.389   | 0.653      | 0.452      | 6.5   | 0.24  |
|             | 0.85       | 52      | 107     | 2.1 | 0.289            | 12.2             | 0.380   | 0.656      | 0.437      | 6.6   | 0.22  |
| M6          | 0.56       | 50      | 106     | 2.1 | 0.451            | 13.5             | 0.339   | 0.700      | 0.409      | 4.6   | 0.33  |
|             | 0.85       | 53      | 119     | 2.2 | 0.278            | 5.2              | 0.434   | 0.619      | 0.497      | 4.8   | 0.34  |
|             | 0.85       | 52      | 113     | 2.2 | 0.279            | 5.7              | 0.439   | 0.609      | 0.494      | 4.6   | 0.33  |
| M7          | 0.56       | 86      | 185     | 2.2 | 0.416            | 2.3              | 0.110   | 0.898      | 0.161      | 17.5  | 0.10  |
|             | 0.56       | 85      | 183     | 2.2 | 0.415            | 1.8              | 0.109   | 0.899      | 0.159      | 17.8  | 0.09  |
|             | 0.85       | 85      | 182     | 2.1 | 0.274            | 2.1              | 0.159   | 0.858      | 0.239      | 18.0  | 0.11  |
|             | 0.85       | 84      | 180     | 2.1 | 0.273            | 1.7              | 0.163   | 0.853      | 0.235      | 17.3  | 0.10  |



| Catalyst ID | $v_H$ (mL) | $M_n^a$ | $M_w^a$ | PDI | $[E]/[H]_{av}^b$ | $[H], conv (\%)^c$ | $x_H^d$ | $p_{EE}^e$ | $p_{HH}^e$ | $r_E$ | $r_H$ |
|-------------|------------|---------|---------|-----|------------------|--------------------|---------|------------|------------|-------|-------|
| M8          | 1.00       | 80      | 189     | 2.4 | 0.236            | 5.0                | 0.244   | 0.811      | 0.380      | 18.2  | 0.14  |
|             | 1.00       | 90      | 195     | 2.2 | 0.237            | 5.4                | 0.241   | 0.804      | 0.353      | 17.3  | 0.13  |
|             | 1.50       | 98      | 211     | 2.2 | 0.158            | 5.9                | 0.357   | 0.727      | 0.493      | 16.8  | 0.15  |
| M9          | 0.56       | 74      | 167     | 2.3 | 0.429            | 8.2                | 0.288   | 0.721      | 0.301      | 6.0   | 0.18  |
|             | 0.56       | 77      | 174     | 2.3 | 0.423            | 5.6                | 0.300   | 0.715      | 0.311      | 5.9   | 0.19  |
|             | 0.85       | 78      | 177     | 2.3 | 0.285            | 9.8                | 0.401   | 0.611      | 0.393      | 5.5   | 0.18  |
|             | 0.85       | 83      | 181     | 2.2 | 0.285            | 10.0               | 0.400   | 0.612      | 0.396      | 5.5   | 0.19  |
| M10         | 0.56       | 77      | 179     | 2.3 | 0.440            | 12.8               | 0.326   | 0.680      | 0.314      | 4.8   | 0.20  |
|             | 0.56       | 88      | 185     | 2.1 | 0.437            | 11.5               | 0.326   | 0.680      | 0.314      | 4.9   | 0.20  |
|             | 0.85       | 88      | 195     | 2.2 | 0.289            | 12.7               | 0.429   | 0.578      | 0.424      | 4.7   | 0.21  |
|             | 0.85       | 91      | 189     | 2.1 | 0.291            | 13.4               | 0.429   | 0.570      | 0.417      | 4.6   | 0.21  |
| M11         | 0.56       | 98      | 207     | 2.1 | 0.440            | 13.0               | 0.341   | 0.646      | 0.293      | 4.1   | 0.18  |
|             | 0.56       | 102     | 215     | 2.1 | 0.437            | 11.5               | 0.338   | 0.647      | 0.287      | 4.2   | 0.18  |
|             | 0.85       | 99      | 211     | 2.1 | 0.286            | 10.3               | 0.440   | 0.535      | 0.395      | 4.0   | 0.19  |
|             | 0.85       | 102     | 209     | 2.0 | 0.285            | 9.7                | 0.439   | 0.535      | 0.395      | 4.0   | 0.19  |
| M12         | 0.56       | 66      | 170     | 2.6 | 0.432            | 9.4                | 0.335   | 0.663      | 0.305      | 4.6   | 0.19  |
|             | 0.56       | 67      | 169     | 2.5 | 0.430            | 8.5                | 0.334   | 0.663      | 0.314      | 4.6   | 0.20  |
|             | 0.85       | 74      | 177     | 2.4 | 0.290            | 12.7               | 0.411   | 0.579      | 0.373      | 4.7   | 0.17  |
|             | 0.85       | 75      | 173     | 2.3 | 0.287            | 11.2               | 0.425   | 0.557      | 0.398      | 4.4   | 0.19  |
| M13         | 0.56       | 81      | 184     | 2.3 | 0.440            | 12.8               | 0.336   | 0.630      | 0.268      | 3.9   | 0.161 |
|             | 0.56       | 73      | 182     | 2.5 | 0.440            | 12.6               | 0.361   | 0.602      | 0.296      | 3.4   | 0.185 |
|             | 0.56       | 79      | 172     | 2.2 | 0.445            | 14.9               | 0.361   | 0.606      | 0.299      | 3.5   | 0.190 |
|             | 0.85       | 80      | 178     | 2.2 | 0.287            | 11.0               | 0.440   | 0.511      | 0.386      | 3.6   | 0.180 |
|             | 0.85       | 72      | 171     | 2.4 | 0.291            | 13.7               | 0.434   | 0.526      | 0.382      | 3.8   | 0.180 |
| M14         | 0.56       | 95      | 208     | 2.2 | 0.433            | 10.1               | 0.375   | 0.586      | 0.304      | 3.3   | 0.19  |
|             | 0.56       | 94      | 198     | 2.1 | 0.439            | 12.4               | 0.374   | 0.592      | 0.307      | 3.3   | 0.19  |
|             | 0.85       | 89      | 196     | 2.2 | 0.287            | 11.0               | 0.455   | 0.496      | 0.383      | 3.4   | 0.18  |
| M15         | 0.56       | 75      | 155     | 2.1 | 0.433            | 10.0               | 0.333   | 0.680      | 0.340      | 4.9   | 0.22  |
|             | 0.56       | 73      | 150     | 2.1 | 0.434            | 10.1               | 0.308   | 0.710      | 0.320      | 5.6   | 0.20  |
|             | 0.85       | 73      | 166     | 2.3 | 0.283            | 8.4                | 0.431   | 0.573      | 0.427      | 4.7   | 0.21  |
|             | 0.85       | 73      | 158     | 2.2 | 0.287            | 11.3               | 0.422   | 0.603      | 0.442      | 5.3   | 0.23  |

| Catalyst ID | $v_H$ (mL) | $M_n^a$ | $M_w^a$ | PDI | $[E]/[H]_{av}^b$ | $[H], conv (\%)^c$ | $x_H^d$ | $p_{EE}^e$ | $p_{HH}^e$ | $r_E$ | $r_H$ |
|-------------|------------|---------|---------|-----|------------------|--------------------|---------|------------|------------|-------|-------|
| M16         | 0.56       | 54      | 122     | 2.3 | 0.434            | 10.2               | 0.321   | 0.695      | 0.338      | 5.3   | 0.22  |
|             | 0.56       | 55      | 130     | 2.4 | 0.432            | 9.6                | 0.322   | 0.695      | 0.340      | 5.3   | 0.22  |
|             | 0.85       | 67      | 149     | 2.2 | 0.289            | 12.4               | 0.418   | 0.598      | 0.439      | 5.1   | 0.23  |
|             | 0.85       | 55      | 134     | 2.4 | 0.289            | 12.6               | 0.419   | 0.597      | 0.429      | 5.1   | 0.22  |
| M17         | 0.56       | 46      | 102     | 2.2 | 0.420            | 3.9                | 0.336   | 0.690      | 0.399      | 4.5   | 0.33  |
|             | 0.85       | 51      | 109     | 2.1 | 0.274            | 2.4                | 0.460   | 0.587      | 0.510      | 4.2   | 0.35  |
|             | 0.85       | 48      | 109     | 2.3 | 0.277            | 4.1                | 0.448   | 0.605      | 0.508      | 4.5   | 0.35  |
| M18         | 0.56       | 75      | 168     | 2.2 | 0.415            | 1.7                | 0.112   | 0.898      | 0.173      | 17.6  | 0.10  |
|             | 0.85       | 75      | 173     | 2.3 | 0.274            | 2.4                | 0.173   | 0.848      | 0.258      | 16.6  | 0.12  |
|             | 0.85       | 76      | 168     | 2.2 | 0.274            | 1.7                | 0.168   | 0.850      | 0.238      | 16.9  | 0.10  |
| M19         | 0.56       | 90      | 199     | 2.2 | 0.430            | 8.8                | 0.326   | 0.716      | 0.386      | 5.9   | 0.27  |
|             | 0.56       | 89      | 199     | 2.2 | 0.430            | 8.5                | 0.322   | 0.725      | 0.406      | 6.1   | 0.29  |
|             | 0.85       | 74      | 161     | 2.2 | 0.290            | 13.1               | 0.468   | 0.582      | 0.517      | 4.8   | 0.31  |
|             | 0.85       | 77      | 171     | 2.2 | 0.287            | 10.9               | 0.451   | 0.606      | 0.518      | 5.4   | 0.31  |
| M20         | 0.56       | 69      | 168     | 2.4 | 0.431            | 8.9                | 0.317   | 0.715      | 0.371      | 5.8   | 0.25  |
|             | 0.56       | 75      | 180     | 2.4 | 0.431            | 9.0                | 0.341   | 0.704      | 0.409      | 5.5   | 0.30  |
|             | 0.85       | 72      | 188     | 2.6 | 0.283            | 8.3                | 0.444   | 0.611      | 0.496      | 5.6   | 0.28  |
|             | 0.85       | 76      | 191     | 2.5 | 0.286            | 10.2               | 0.440   | 0.608      | 0.493      | 5.4   | 0.28  |
| M21         | 3.40       | 145     | 296     | 2.0 | 0.068            | 0.5                | 0.111   | 0.895      | 0.153      | 125.4 | 0.012 |
|             | 4.25       | 99      | 237     | 2.4 | 0.054            | 0.6                | 0.148   | 0.865      | 0.177      | 117.8 | 0.012 |
|             | 4.25       | 106     | 229     | 2.2 | 0.054            | 0.6                | 0.140   | 0.872      | 0.197      | 125.3 | 0.013 |
| M22         | 0.56       | 64      | 139     | 2.2 | 0.428            | 7.5                | 0.209   | 0.803      | 0.243      | 9.5   | 0.14  |
|             | 0.85       | 64      | 130     | 2.0 | 0.284            | 9.1                | 0.298   | 0.724      | 0.332      | 9.2   | 0.14  |
|             | 0.85       | 225     | 491     | 2.2 | 0.281            | 7.3                | 0.293   | 0.729      | 0.311      | 9.6   | 0.13  |
| M23         | 0.56       | 99      | 215     | 2.2 | 0.440            | 13.0               | 0.315   | 0.699      | 0.317      | 5.3   | 0.20  |
|             | 0.85       | 107     | 227     | 2.1 | 0.287            | 11.4               | 0.401   | 0.604      | 0.403      | 5.3   | 0.19  |
| M24         | 0.56       | 77      | 179     | 2.3 | 0.417            | 2.4                | 0.293   | 0.700      | 0.263      | 4.6   | 0.18  |
|             | 0.56       | 77      | 183     | 2.4 | 0.418            | 3.0                | 0.314   | 0.673      | 0.268      | 4.1   | 0.18  |
|             | 0.85       | 73      | 178     | 2.4 | 0.276            | 3.7                | 0.391   | 0.585      | 0.361      | 4.2   | 0.19  |
| M25         | 0.85       | 70      | 156     | 2.2 | 0.275            | 3.0                | 0.417   | 0.560      | 0.386      | 3.8   | 0.21  |
|             | 0.85       | 71      | 158     | 2.2 | 0.278            | 5.1                | 0.411   | 0.561      | 0.374      | 3.8   | 0.20  |

| Catalyst ID | $v_H$ (mL) | $M_n^a$ | $M_w^a$ | PDI | $[E]/[H]_{av}^b$ | $[H], conv (\%)^c$ | $x_H^d$ | $p_{EE}^e$ | $p_{HH}^e$ | $r_E$ | $r_H$ |
|-------------|------------|---------|---------|-----|------------------|--------------------|---------|------------|------------|-------|-------|
| M26         | 0.56       | 79      | 178     | 2.3 | 0.435            | 10.7               | 0.335   | 0.671      | 0.330      | 4.7   | 0.21  |
|             | 0.56       | 84      | 185     | 2.2 | 0.435            | 10.9               | 0.328   | 0.683      | 0.321      | 4.9   | 0.21  |
|             | 0.85       | 73      | 160     | 2.2 | 0.297            | 17.4               | 0.437   | 0.560      | 0.427      | 4.3   | 0.22  |
|             | 0.85       | 78      | 174     | 2.2 | 0.293            | 15.1               | 0.433   | 0.570      | 0.421      | 4.5   | 0.21  |
| M27         | 0.56       | 37      | 79      | 2.1 | 0.439            | 12.5               | 0.347   | 0.630      | 0.314      | 3.9   | 0.20  |
|             | 0.56       | 36      | 79      | 2.2 | 0.439            | 12.5               | 0.360   | 0.620      | 0.312      | 3.7   | 0.20  |
|             | 0.85       | 27      | 54      | 2.0 | 0.293            | 13.8               | 0.444   | 0.515      | 0.386      | 3.6   | 0.18  |
|             | 0.85       | 27      | 55      | 2.0 | 0.293            | 14.0               | 0.436   | 0.526      | 0.380      | 3.8   | 0.18  |
| M28         | 4.25       | 116     | 253     | 2.2 | 0.054            | 0.5                | 0.083   | 0.913      | 0.038      | 193.1 | 0.002 |
|             | 4.25       | 94      | 207     | 2.2 | 0.054            | 0.4                | 0.086   | 0.908      | 0.041      | 181.7 | 0.002 |
| M29         | 0.56       | 77      | 174     | 2.3 | 0.433            | 9.9                | 0.364   | 0.615      | 0.314      | 3.7   | 0.20  |
|             | 0.85       | 63      | 139     | 2.2 | 0.282            | 7.5                | 0.472   | 0.505      | 0.431      | 3.6   | 0.21  |
|             | 0.85       | 52      | 118     | 2.3 | 0.286            | 10.4               | 0.461   | 0.501      | 0.413      | 3.5   | 0.20  |
| M30         | 0.56       | 80      | 177     | 2.2 | 0.436            | 11.1               | 0.365   | 0.645      | 0.364      | 4.2   | 0.25  |
|             | 0.85       | 73      | 166     | 2.3 | 0.282            | 7.9                | 0.489   | 0.514      | 0.475      | 3.7   | 0.26  |
|             | 0.85       | 82      | 190     | 2.3 | 0.283            | 8.5                | 0.462   | 0.535      | 0.462      | 4.1   | 0.24  |
| M31         | 0.56       | 41      | 92      | 2.2 | 0.459            | 10.4               | 0.353   | 0.672      | 0.392      | 4.5   | 0.30  |
|             | 0.85       | 44      | 93      | 2.1 | 0.290            | 13.3               | 0.425   | 0.604      | 0.457      | 5.3   | 0.24  |
|             | 0.56       | 42      | 81      | 1.9 | 0.430            | 8.5                | 0.322   | 0.701      | 0.362      | 5.5   | 0.24  |
|             | 0.85       | 41      | 86      | 2.1 | 0.292            | 14.2               | 0.460   | 0.568      | 0.492      | 4.5   | 0.28  |
|             | 0.85       | 37      | 73      | 2.0 | 0.302            | 20.5               | 0.440   | 0.587      | 0.471      | 4.7   | 0.27  |
| M32         | 0.56       | 66      | 140     | 2.1 | 0.437            | 11.4               | 0.290   | 0.702      | 0.252      | 5.4   | 0.15  |
|             | 0.56       | 68      | 144     | 2.1 | 0.433            | 9.8                | 0.291   | 0.705      | 0.241      | 5.5   | 0.14  |
|             | 0.85       | 58      | 126     | 2.2 | 0.286            | 10.6               | 0.390   | 0.613      | 0.360      | 5.5   | 0.16  |
|             | 0.85       | 68      | 135     | 2.0 | 0.285            | 10.1               | 0.378   | 0.595      | 0.335      | 5.1   | 0.14  |
| M33         | 0.56       | 53      | 115     | 2.2 | 0.438            | 11.8               | 0.609   | 0.617      | 0.250      | 3.7   | 0.15  |
|             | 0.56       | 51      | 107     | 2.1 | 0.452            | 12.6               | 0.356   | 0.584      | 0.250      | 3.1   | 0.15  |
|             | 0.85       | 50      | 117     | 2.3 | 0.281            | 7.4                | 0.355   | 0.528      | 0.286      | 4.0   | 0.11  |
| M34         | 0.56       | 74      | 166     | 2.2 | 0.434            | 10.1               | 0.316   | 0.719      | 0.364      | 5.9   | 0.25  |
|             | 0.56       | 77      | 169     | 2.2 | 0.434            | 10.2               | 0.320   | 0.714      | 0.362      | 5.8   | 0.25  |
|             | 0.85       | 61      | 140     | 2.3 | 0.285            | 9.8                | 0.421   | 0.615      | 0.457      | 5.6   | 0.24  |
|             | 0.85       | 63      | 136     | 2.2 | 0.285            | 10.0               | 0.401   | 0.627      | 0.448      | 5.9   | 0.23  |

| Catalyst ID | $v_H$ (mL) | $M_n^a$ | $M_w^a$ | PDI | $[E]/[H]_{av}^b$ | $[H], conv (\%)^c$ | $x_H^d$ | $p_{EE}^e$ | $p_{HH}^e$ | $r_E$ | $r_H$ |
|-------------|------------|---------|---------|-----|------------------|--------------------|---------|------------|------------|-------|-------|
| M35         | 0.56       | 69      | 175     | 2.5 | 0.434            | 10.4               | 0.357   | 0.691      | 0.433      | 5.1   | 0.33  |
|             | 0.85       | 88      | 220     | 2.5 | 0.289            | 12.3               | 0.467   | 0.585      | 0.518      | 4.9   | 0.31  |
|             | 0.85       | 84      | 191     | 2.3 | 0.288            | 11.6               | 0.475   | 0.579      | 0.530      | 4.8   | 0.32  |
|             | 0.85       | 94      | 239     | 2.5 | 0.296            | 13.7               | 0.474   | 0.566      | 0.507      | 4.4   | 0.30  |
| M36         | 0.56       | 21      | 53      | 2.5 | 0.431            | 9.1                | 0.393   | 0.575      | 0.332      | 3.1   | 0.21  |
|             | 0.56       | 18      | 40      | 2.2 | 0.437            | 11.6               | 0.396   | 0.562      | 0.336      | 2.9   | 0.22  |
|             | 0.85       | 16      | 37      | 2.3 | 0.278            | 4.7                | 0.483   | 0.467      | 0.425      | 3.2   | 0.21  |
|             | 0.85       | 19      | 43      | 2.3 | 0.280            | 6.1                | 0.477   | 0.459      | 0.418      | 3.0   | 0.20  |
| M37         | 0.56       | 118     | 264     | 2.2 | 0.446            | 14.3               | 0.332   | 0.666      | 0.310      | 4.5   | 0.20  |
|             | 0.56       | 122     | 272     | 2.2 | 0.442            | 13.7               | 0.332   | 0.664      | 0.308      | 4.5   | 0.20  |
|             | 0.85       | 107     | 233     | 2.2 | 0.291            | 13.8               | 0.439   | 0.557      | 0.419      | 4.3   | 0.21  |
|             | 0.85       | 122     | 272     | 2.2 | 0.288            | 11.4               | 0.423   | 0.571      | 0.402      | 4.6   | 0.19  |
| M38         | 0.56       | 35      | 75      | 2.1 | 0.439            | 12.5               | 0.450   | 0.497      | 0.373      | 2.3   | 0.26  |
|             | 0.56       | 37      | 78      | 2.1 | 0.436            | 11.4               | 0.437   | 0.513      | 0.383      | 2.4   | 0.27  |
|             | 0.85       | 35      | 75      | 2.1 | 0.289            | 12.2               | 0.532   | 0.388      | 0.450      | 2.2   | 0.24  |
|             | 0.85       | 33      | 70      | 2.1 | 0.297            | 17.6               | 0.528   | 0.387      | 0.469      | 2.1   | 0.26  |
| M39         | 0.56       | 76      | 181     | 2.4 | 0.428            | 7.9                | 0.363   | 0.604      | 0.311      | 3.6   | 0.19  |
|             | 0.56       | 81      | 185     | 2.3 | 0.436            | 11.2               | 0.353   | 0.615      | 0.283      | 3.7   | 0.17  |
|             | 0.85       | 72      | 163     | 2.3 | 0.291            | 13.5               | 0.435   | 0.522      | 0.355      | 3.8   | 0.16  |
| M40         | 0.56       | 75      | 187     | 2.5 | 0.439            | 12.3               | 0.336   | 0.635      | 0.274      | 4.0   | 0.166 |
|             | 0.56       | 75      | 187     | 2.5 | 0.440            | 12.9               | 0.333   | 0.648      | 0.287      | 4.2   | 0.177 |
|             | 0.85       | 66      | 169     | 2.6 | 0.282            | 7.6                | 0.410   | 0.557      | 0.369      | 4.5   | 0.165 |
|             | 0.85       | 70      | 173     | 2.5 | 0.284            | 9.3                | 0.402   | 0.574      | 0.364      | 4.7   | 0.163 |

<sup>a</sup> in kDa, <sup>b</sup> average feeding ratio, <sup>c</sup> conversion of 1-hexene in %, <sup>d</sup> mol fraction of 1-hexene in the copolymer, <sup>e</sup>  $p_{EE}$  conditional probability of ethene insertion after ethene insertion;  $p_{HH}$  conditional probability of 1-hexene insertion after 1-hexene insertion

## 2. QSAR Modeling

**Table S3.** Procedures for Descriptor Determination.

| #  | Descriptor                             | SambVca (D1-D6) or Gaussian (D7) procedure          |                                                                                                                                                                                                       |
|----|----------------------------------------|-----------------------------------------------------|-------------------------------------------------------------------------------------------------------------------------------------------------------------------------------------------------------|
| D1 | $\Delta\%V_{\text{Bur,Zr}}$            | Coordinate System                                   | center of the Sphere: Zr, z-axis: Si-Zr, xz-plane: Cl                                                                                                                                                 |
|    |                                        | Deleted Atoms                                       | ZrCl <sub>2</sub> + SiR <sub>2</sub> bridge + all atoms in 5-, 6-, and 7-position + additional atoms on the 2-position substituent (for details see <i>Polymers</i> , <b>2020</b> , <i>12</i> , 1005) |
|    |                                        | Sphere Size and Position                            | 5.0 Å, Center on Zr                                                                                                                                                                                   |
| D2 | $\%V_{\text{Bur}(C2+C3)}$              | Coordinate System                                   | center of the Sphere: C3, z-axis: middle of the two opposite C-atoms, xz-plane: C2                                                                                                                    |
|    |                                        | Deleted Atoms                                       | ZrCl <sub>2</sub> , SiR <sub>2</sub> bridge                                                                                                                                                           |
|    |                                        | Sphere Size and Position                            | 3.5 Å, Center on C3                                                                                                                                                                                   |
| D3 | $\%V_{\text{Bur}(C2+C3),\text{Front}}$ | Coordinate System                                   | center of the Sphere: Cl, z-axis: Zr-Cl, xz-plane: Si                                                                                                                                                 |
|    |                                        | Deleted Atoms                                       | ZrCl <sub>2</sub>                                                                                                                                                                                     |
|    |                                        | Sphere Size and Position                            | 3.5 Å, Center on Cl                                                                                                                                                                                   |
| D4 | $\%V_{\text{Bur}(C5+C6)}$              | Coordinate System                                   | center of the Sphere: Cl, z-axis: Zr-Cl, xz-plane: Si                                                                                                                                                 |
|    |                                        | Deleted Atoms                                       | ZrCl <sub>2</sub> , SiR <sub>2</sub> bridge                                                                                                                                                           |
|    |                                        | Sphere Size and Position                            | 6.5 Å, Center on Cl                                                                                                                                                                                   |
| D5 | $\%V_{\text{Bur,C4}}$                  | Coordinate System                                   | center of the Sphere: Cl, z-axis: Zr-Cl, xz-plane: Si                                                                                                                                                 |
|    |                                        | Deleted Atoms                                       | ZrCl <sub>2</sub>                                                                                                                                                                                     |
|    |                                        | Sphere Size and Position                            | 3.5 Å, Center +2 Å away from Cl                                                                                                                                                                       |
| D6 | $\%V_{\text{Bur,open}}$                | Coordinate System                                   | center of the Sphere: Zr, z-axis: Si-Zr, xz-plane: Cl                                                                                                                                                 |
|    |                                        | Deleted Atoms                                       | ZrCl <sub>2</sub>                                                                                                                                                                                     |
|    |                                        | Sphere Size and Position                            | 3.0 Å, Center +1.5 Å away from Cl                                                                                                                                                                     |
| D7 | $q_{\text{ZrCl}_2}$                    | Sum of the NPA charges (NBO 3.0) on Zr and Cl atoms |                                                                                                                                                                                                       |

Equations

**Comonomer affinity after ethene insertion:**

$$\Delta\Delta G^{\ddagger}_{\text{EH-EE}} = RT \ln (r_{\text{E}}) \quad (\text{Eq. S1})$$

**Comonomer affinity after 1-hexene insertion:**

$$\Delta\Delta G^{\ddagger}_{\text{HE-HH}} = RT \ln (r_{\text{H}}) \quad (\text{Eq. S2})$$

**Table S4.** Experimental data used for QSAR modeling.

| Catalyst              | $r_E$ | $r_H$ | $\Delta\Delta G^\ddagger_{EH-EE}$ | $\Delta\Delta G^\ddagger_{HE-HH}$ |
|-----------------------|-------|-------|-----------------------------------|-----------------------------------|
| <b>Training Set</b>   |       |       |                                   |                                   |
| <b>M21</b>            | 123   | 0.012 | 3.19                              | -2.93                             |
| <b>M7</b>             | 17.7  | 0.10  | 1.90                              | -1.52                             |
| <b>M1</b>             | 19    | 0.012 | 1.95                              | -2.93                             |
| <b>M3</b>             | 10.5  | 0.11  | 1.56                              | -1.46                             |
| <b>M17</b>            | 4.4   | 0.34  | 0.98                              | -0.71                             |
| <b>M5</b>             | 6.6   | 0.22  | 1.25                              | -1.00                             |
| <b>M37</b>            | 4.5   | 0.2   | 1.00                              | -1.07                             |
| <b>M11</b>            | 4.1   | 0.18  | 0.93                              | -1.14                             |
| <b>M15</b>            | 5.1   | 0.22  | 1.08                              | -1.00                             |
| <b>M31</b>            | 4.9   | 0.27  | 1.05                              | -0.87                             |
| <b>M9</b>             | 5.7   | 0.19  | 1.15                              | -1.10                             |
| <b>M23</b>            | 5.3   | 0.19  | 1.10                              | -1.10                             |
| <b>M29</b>            | 3.6   | 0.2   | 0.85                              | -1.07                             |
| <b>M19</b>            | 5.5   | 0.3   | 1.13                              | -0.80                             |
| <b>M27</b>            | 3.8   | 0.19  | 0.88                              | -1.10                             |
| <b>M35</b>            | 4.8   | 0.32  | 1.04                              | -0.75                             |
| <b>M25</b>            | 3.8   | 0.21  | 0.88                              | -1.03                             |
| <b>M33</b>            | 3.6   | 0.14  | 0.85                              | -1.30                             |
| <b>M39</b>            | 3.7   | 0.18  | 0.87                              | -1.14                             |
| <b>M13</b>            | 3.6   | 0.18  | 0.85                              | -1.14                             |
| <b>Validation Set</b> |       |       |                                   |                                   |
| <b>M18</b>            | 17    | 0.11  | 1.88                              | -1.46                             |
| <b>M8</b>             | 17    | 0.14  | 1.88                              | -1.30                             |
| <b>M22</b>            | 9.4   | 0.14  | 1.48                              | -1.30                             |
| <b>M6</b>             | 4.6   | 0.33  | 1.01                              | -0.73                             |
| <b>M4</b>             | 6.4   | 0.18  | 1.23                              | -1.14                             |
| <b>M10</b>            | 4.7   | 0.21  | 1.02                              | -1.03                             |
| <b>M12</b>            | 4.6   | 0.19  | 1.01                              | -1.10                             |
| <b>M2</b>             | 5     | 0.2   | 1.07                              | -1.07                             |
| <b>M16</b>            | 5.2   | 0.22  | 1.09                              | -1.00                             |
| <b>M26</b>            | 4.6   | 0.21  | 1.01                              | -1.03                             |
| <b>M14</b>            | 3.3   | 0.19  | 0.79                              | -1.10                             |
| <b>M20</b>            | 5.6   | 0.28  | 1.14                              | -0.84                             |
| <b>M32</b>            | 5.4   | 0.15  | 1.12                              | -1.26                             |
| <b>M24</b>            | 4.3   | 0.18  | 0.97                              | -1.14                             |
| <b>M38</b>            | 2.2   | 0.26  | 0.52                              | -0.89                             |
| <b>M34</b>            | 5.8   | 0.24  | 1.16                              | -0.94                             |
| <b>M30</b>            | 4     | 0.25  | 0.92                              | -0.92                             |
| <b>M36</b>            | 3.1   | 0.21  | 0.75                              | -1.03                             |
| <b>M40</b>            | 4.5   | 0.17  | 1.00                              | -1.17                             |
| <b>M28</b>            | 187   | 0.002 | 3.46                              | -4.11                             |

**Table S5.** Experimental and predicted  $\Delta\Delta G^\ddagger_{EH-EE}$ , descriptor values and model deviations.

| Catalyst              | deleted atoms                             | $r_E$ | $\Delta\Delta G^\ddagger_{EH-EE}$<br>kcal/mol | % $V_{Bur,open}$<br>(D6) | % $V_{Bur,C4}$<br>(D5) | Bondi vdW<br>radius<br>(D8) | $\Delta\Delta G^\ddagger_{EH-EE, QSAR}$<br>kcal/mol | $ \Delta _{exp-pred}$<br>(kcal/mol) | $ \Delta ^2_{exp-pred}$ |
|-----------------------|-------------------------------------------|-------|-----------------------------------------------|--------------------------|------------------------|-----------------------------|-----------------------------------------------------|-------------------------------------|-------------------------|
| <b>Training Set</b>   |                                           |       |                                               |                          |                        |                             |                                                     |                                     |                         |
| <b>M21</b>            | 2-Me: far H                               | 123   | 3.19                                          | 39.4                     | 19.5                   | 170                         | 3.21                                                | 0.03                                | 0.00                    |
| <b>M7</b>             | 2-Me: far H                               | 17.7  | 1.90                                          | 35.5                     | 7.5                    | 170                         | 1.66                                                | 0.24                                | 0.06                    |
| <b>M1</b>             | 2-Me: far H                               | 19.0  | 1.95                                          | 34.6                     | 4.0                    | 120                         | 1.99                                                | 0.04                                | 0.00                    |
| <b>M3</b>             | 2-Me: far H                               | 10.5  | 1.56                                          | 34.9                     | 9.5                    | 170                         | 1.34                                                | 0.22                                | 0.05                    |
| <b>M17</b>            | 2-Me: far H                               | 4.4   | 0.98                                          | 34.7                     | 7.5                    | 185                         | 1.09                                                | 0.11                                | 0.01                    |
| <b>M5</b>             | 2-Me: far H                               | 6.6   | 1.25                                          | 34.6                     | 6.9                    | 175                         | 1.19                                                | 0.06                                | 0.00                    |
| <b>M37</b>            | 2-Et: far Me                              | 4.5   | 1.00                                          | 34.8                     | 18.5                   | 170                         | 1.08                                                | 0.09                                | 0.01                    |
| <b>M11</b>            | 2-Me: far H                               | 4.1   | 0.93                                          | 34.8                     | 18.1                   | 170                         | 1.09                                                | 0.16                                | 0.02                    |
| <b>M15</b>            | 2-Me: far H                               | 5.1   | 1.08                                          | 34.8                     | 19.1                   | 170                         | 1.07                                                | 0.01                                | 0.00                    |
| <b>M31</b>            | 2-Me: far H                               | 4.9   | 1.05                                          | 34.7                     | 7.6                    | 185                         | 1.09                                                | 0.04                                | 0.00                    |
| <b>M9</b>             | 2-Me: far H                               | 5.7   | 1.15                                          | 34.8                     | 18.4                   | 170                         | 1.08                                                | 0.07                                | 0.00                    |
| <b>M23</b>            | 2-Me: far H                               | 5.3   | 1.10                                          | 34.8                     | 18.5                   | 170                         | 1.08                                                | 0.02                                | 0.00                    |
| <b>M29</b>            | 2-Me: far H                               | 3.6   | 0.85                                          | 35.4                     | 31.9                   | 170                         | 1.05                                                | 0.20                                | 0.04                    |
| <b>M19</b>            | 2-Me: far H                               | 5.5   | 1.13                                          | 34.9                     | 20.2                   | 170                         | 1.09                                                | 0.04                                | 0.00                    |
| <b>M27</b>            | 2-Me: far H                               | 3.8   | 0.88                                          | 34.7                     | 18.2                   | 170                         | 1.04                                                | 0.16                                | 0.03                    |
| <b>M35</b>            | 2-Me: far H                               | 4.8   | 1.04                                          | 34.8                     | 20.4                   | 170                         | 1.04                                                | 0.00                                | 0.00                    |
| <b>M25</b>            | 2-Me: far H                               | 3.8   | 0.88                                          | 34.8                     | 18.7                   | 170                         | 1.08                                                | 0.19                                | 0.04                    |
| <b>M33</b>            | 2-Me: far H                               | 3.6   | 0.85                                          | 34.8                     | 33.8                   | 170                         | 0.73                                                | 0.12                                | 0.01                    |
| <b>M39</b>            | 2-Me: far H                               | 3.7   | 0.87                                          | 34.8                     | 33.5                   | 170                         | 0.73                                                | 0.13                                | 0.02                    |
| <b>M13</b>            | 2-Me: far H                               | 3.6   | 0.85                                          | 35.0                     | 37.1                   | 170                         | 0.74                                                | 0.10                                | 0.01                    |
| <b>Validation Set</b> |                                           |       |                                               |                          |                        |                             |                                                     |                                     |                         |
| <b>M18</b>            | 2-Me: far H                               | 17.0  | 1.88                                          | 35.5                     | 7.5                    | 170                         | 1.66                                                | 0.21                                | 0.04                    |
| <b>M8</b>             | 2-Me: far H                               | 17.0  | 1.88                                          | 36.2                     | 16.0                   | 170                         | 1.79                                                | 0.08                                | 0.01                    |
| <b>M22</b>            | 2-Me: far H                               | 9.4   | 1.48                                          | 34.9                     | 9.5                    | 170                         | 1.34                                                | 0.15                                | 0.02                    |
| <b>M6</b>             | 2-Me: far H                               | 4.6   | 1.01                                          | 34.7                     | 7.5                    | 185                         | 1.09                                                | 0.08                                | 0.01                    |
| <b>M4</b>             | 2-Me: far H                               | 6.4   | 1.23                                          | 34.7                     | 18.0                   | 170                         | 1.05                                                | 0.18                                | 0.03                    |
| <b>M10</b>            | 2-Me: far H                               | 4.7   | 1.02                                          | 34.7                     | 17.9                   | 170                         | 1.05                                                | 0.02                                | 0.00                    |
| <b>M12</b>            | 2-Me: far H                               | 4.6   | 1.01                                          | 34.8                     | 18.7                   | 170                         | 1.08                                                | 0.07                                | 0.00                    |
| <b>M2</b>             | 2-Me: far H                               | 5.0   | 1.07                                          | 34.8                     | 18.7                   | 170                         | 1.08                                                | 0.01                                | 0.00                    |
| <b>M16</b>            | 2-Me: far H                               | 5.2   | 1.09                                          | 34.7                     | 26.4                   | 170                         | 0.85                                                | 0.24                                | 0.06                    |
| <b>M26</b>            | 2-Me: far H                               | 4.6   | 1.01                                          | 34.7                     | 18.5                   | 170                         | 1.04                                                | 0.02                                | 0.00                    |
| <b>M14</b>            | 2-Me: far H                               | 3.3   | 0.79                                          | 34.8                     | 33.1                   | 170                         | 0.74                                                | 0.05                                | 0.00                    |
| <b>M20</b>            | 2-Me: far H                               | 5.6   | 1.14                                          | 34.9                     | 19.8                   | 170                         | 1.10                                                | 0.04                                | 0.00                    |
| <b>M32</b>            | 2-Me: far H                               | 5.4   | 1.12                                          | 34.7                     | 18.3                   | 170                         | 1.04                                                | 0.08                                | 0.01                    |
| <b>M24</b>            | 2-Me: far H                               | 4.3   | 0.97                                          | 34.8                     | 18.6                   | 170                         | 1.08                                                | 0.11                                | 0.01                    |
| <b>M38</b>            | 2-Me: far H                               | 2.2   | 0.52                                          | 34.4                     | 38.2                   | 155                         | 0.64                                                | 0.12                                | 0.01                    |
| <b>M34</b>            | 2-Me: far H                               | 5.8   | 1.16                                          | 35.0                     | 20.5                   | 170                         | 1.13                                                | 0.03                                | 0.00                    |
| <b>M30</b>            | 2-Me: far H                               | 4.0   | 0.92                                          | 34.8                     | 22.3                   | 170                         | 0.99                                                | 0.08                                | 0.01                    |
| <b>M36</b>            | 2-iPr: far H, far Me, 2 far H on close Me | 3.1   | 0.75                                          | 34.3                     | 19.0                   | 170                         | 0.84                                                | 0.09                                | 0.01                    |
| <b>M40</b>            | 2-Me: far H                               | 4.5   | 1.00                                          | 35.0                     | 33.7                   | 170                         | 0.82                                                | 0.17                                | 0.03                    |
| <b>M28</b>            | 2-Me: far H                               | 187   | 3.46                                          | 40.1                     | 7.8                    | 170                         | 3.81                                                | 0.35                                | 0.12                    |



**Table S6.** Mean average deviation (MAD), mean squared error (MSE) and root mean squared error (RMSE) for  $\Delta\Delta G_{\text{EH-EE, QSAR}}^\ddagger$ .

|      | Test Set                                 |      | Validation Set                           |
|------|------------------------------------------|------|------------------------------------------|
| MAD  | 0.10 kcal/mol                            | MAD  | 0.11 kcal/mol                            |
| MSE  | 0.02 kcal <sup>2</sup> /mol <sup>2</sup> | MSE  | 0.02 kcal <sup>2</sup> /mol <sup>2</sup> |
| RMSE | 0.12 kcal/mol                            | RMSE | 0.12 kcal/mol                            |

QSAR Modeling –  $r_E$  model, Analysis of Variance

| SUMMARY OUTPUT               |                     |                       |               |                |                       |                  |                    |                    |
|------------------------------|---------------------|-----------------------|---------------|----------------|-----------------------|------------------|--------------------|--------------------|
| <i>Regression Statistics</i> |                     |                       |               |                |                       |                  |                    |                    |
| Multiple R                   | 0.974039            |                       |               |                |                       |                  |                    |                    |
| R Square                     | 0.948752            |                       |               |                |                       |                  |                    |                    |
| Adjusted R Square            | 0.939143            |                       |               |                |                       |                  |                    |                    |
| Standard Error               | 0.139071            |                       |               |                |                       |                  |                    |                    |
| Observations                 | 20                  |                       |               |                |                       |                  |                    |                    |
| <i>ANOVA</i>                 |                     |                       |               |                |                       |                  |                    |                    |
|                              | <i>df</i>           | <i>SS</i>             | <i>MS</i>     | <i>F</i>       | <i>Significance F</i> |                  |                    |                    |
| Regression                   | 3                   | 5.728878              | 1.909626      | 98.73569       | 1.55E-10              |                  |                    |                    |
| Residual                     | 16                  | 0.309453              | 0.019341      |                |                       |                  |                    |                    |
| Total                        | 19                  | 6.03833               |               |                |                       |                  |                    |                    |
|                              | <i>Coefficients</i> | <i>Standard Error</i> | <i>t Stat</i> | <i>P-value</i> | <i>Lower 95%</i>      | <i>Upper 95%</i> | <i>Lower 95.0%</i> | <i>Upper 95.0%</i> |
| Intercept                    | -12.5167            | 1.146111              | -10.921       | 7.95E-09       | -14.9463              | -10.087          | -14.9463           | -10.087            |
| X Variable                   | 0.467872            | 0.030749              | 15.21595      | 6.17E-11       | 0.402688              | 0.533057         | 0.402688           | 0.533057           |
| X Variable                   | -0.02316            | 0.003343              | -6.92769      | 3.4E-06        | -0.03025              | -0.01607         | -0.03025           | -0.01607           |
| X Variable                   | -0.01326            | 0.002584              | -5.13336      | 0.0001         | -0.01874              | -0.00779         | -0.01874           | -0.00779           |

QSAR Modeling –  $r_E$  model, Leave-One-Out Analysis

MEAN = mean experimental value; MAD = mean average deviation; MSE = mean squared error; RMSE = root mean squared error;  $q^2$  = cross-validated  $R^2$

**Table S7.** LOOCV analysis stereoselectivity model.

|    | Catalyst | Yintercept | slopeA   | slopeB   | slopeC   | redictedEXP                                                                              | actualEXP | $R^2$    | adj. $R^2$ | $ \Delta $ | $\Delta^2$ | alEXP-MEAN) <sup>2</sup> |
|----|----------|------------|----------|----------|----------|------------------------------------------------------------------------------------------|-----------|----------|------------|------------|------------|--------------------------|
| 1  | M21      | -16.9632   | 0.597009 | -0.02379 | -0.01351 | 3.798787                                                                                 | 3.19      | 0.849786 | 0.819744   | 0.609      | 0.371      | 3.863                    |
| 2  | M7       | -12.3092   | 0.461977 | -0.02128 | -0.01355 | 1.62766                                                                                  | 1.9       | 0.9552   | 0.94624    | 0.272      | 0.074      | 0.456                    |
| 3  | M1       | -11.0773   | 0.463551 | -0.0253  | -0.0205  | 2.39981                                                                                  | 1.95      | 0.945997 | 0.935197   | 0.450      | 0.202      | 0.526                    |
| 4  | M3       | -12.5882   | 0.470058 | -0.02179 | -0.01352 | 1.312259                                                                                 | 1.56      | 0.956425 | 0.94771    | 0.248      | 0.061      | 0.113                    |
| 5  | M17      | -12.5857   | 0.466477 | -0.02408 | -0.01242 | 1.122309                                                                                 | 0.98      | 0.950181 | 0.940218   | 0.142      | 0.020      | 0.060                    |
| 6  | M5       | -12.5705   | 0.470157 | -0.02257 | -0.0135  | 1.178166                                                                                 | 1.25      | 0.948846 | 0.938615   | 0.072      | 0.005      | 0.001                    |
| 7  | M37      | -12.5008   | 0.467562 | -0.02305 | -0.01328 | 1.086691                                                                                 | 1         | 0.948857 | 0.938628   | 0.087      | 0.008      | 0.050                    |
| 8  | M11      | -12.4613   | 0.466434 | -0.02308 | -0.01325 | 1.100448                                                                                 | 0.93      | 0.951945 | 0.942334   | 0.170      | 0.029      | 0.087                    |
| 9  | M15      | -12.5488   | 0.468935 | -0.02307 | -0.01331 | 1.067484                                                                                 | 1.08      | 0.947967 | 0.93756    | 0.013      | 0.000      | 0.021                    |
| 10 | M31      | -12.5571   | 0.467987 | -0.0234  | -0.01301 | 1.098048                                                                                 | 1.05      | 0.94815  | 0.93778    | 0.048      | 0.002      | 0.030                    |
| 11 | M9       | -12.5761   | 0.469715 | -0.02306 | -0.01332 | 1.080553                                                                                 | 1.15      | 0.948835 | 0.938602   | 0.069      | 0.005      | 0.006                    |
| 12 | M23      | -12.5519   | 0.469022 | -0.02306 | -0.01331 | 1.080973                                                                                 | 1.1       | 0.948048 | 0.937657   | 0.019      | 0.000      | 0.016                    |
| 13 | M29      | -12.6233   | 0.471192 | -0.02123 | -0.01346 | 1.091668                                                                                 | 0.85      | 0.955189 | 0.946227   | 0.242      | 0.058      | 0.140                    |
| 14 | M19      | -12.5571   | 0.469168 | -0.02311 | -0.01331 | 1.087385                                                                                 | 1.13      | 0.948335 | 0.938002   | 0.043      | 0.002      | 0.009                    |
| 15 | M27      | -12.4313   | 0.465567 | -0.02307 | -0.01325 | 1.051895                                                                                 | 0.88      | 0.951736 | 0.942083   | 0.172      | 0.030      | 0.119                    |
| 16 | M35      | -12.5437   | 0.468787 | -0.02306 | -0.0133  | 1.038075                                                                                 | 1.04      | 0.947823 | 0.937387   | 0.002      | 0.000      | 0.034                    |
| 17 | M25      | -12.4412   | 0.465862 | -0.02302 | -0.01325 | 1.08869                                                                                  | 0.88      | 0.953985 | 0.944782   | 0.209      | 0.044      | 0.119                    |
| 18 | M33      | -12.6483   | 0.471757 | -0.0244  | -0.0132  | 0.700372                                                                                 | 0.85      | 0.949896 | 0.939875   | 0.150      | 0.022      | 0.140                    |
| 19 | M39      | -12.6583   | 0.47204  | -0.02451 | -0.01319 | 0.705258                                                                                 | 0.87      | 0.950698 | 0.940837   | 0.165      | 0.027      | 0.126                    |
| 20 | M13      | -12.6001   | 0.470358 | -0.02455 | -0.01317 | 0.712208                                                                                 | 0.85      | 0.949242 | 0.93909    | 0.138      | 0.019      | 0.140                    |
|    |          |            |          |          |          | MEAN                                                                                     |           |          |            | MAD        | MSE        |                          |
|    |          |            |          |          |          | 1.22                                                                                     |           |          |            | 0.166      | 0.049      |                          |
|    |          |            |          |          |          | MAX                                                                                      |           |          |            |            |            |                          |
|    |          |            |          |          |          | 3.19                                                                                     |           |          |            |            |            |                          |
|    |          |            |          |          |          | MIN                                                                                      |           |          |            |            |            |                          |
|    |          |            |          |          |          | 0.85                                                                                     |           |          |            |            |            |                          |
|    |          |            |          |          |          | $q^2 = \frac{\sum(\text{actualEXP-MEAN}) - \sum(\Delta^2)}{\sum(\text{actualEXP-MEAN})}$ |           |          |            |            |            |                          |
|    |          |            |          |          |          | $q^2$                                                                                    | 0.84      |          |            |            |            |                          |

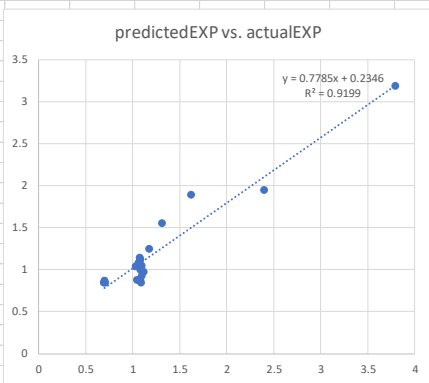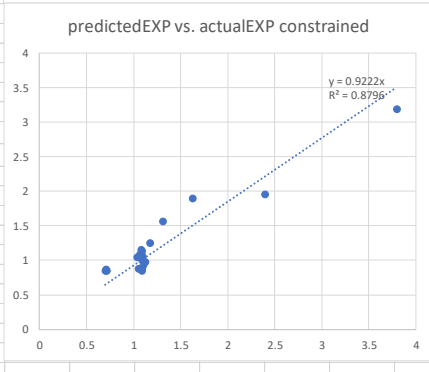

QSAR Modeling –  $r_H$  model

**Table S8.** Experimental and predicted  $\Delta\Delta G^\ddagger_{HE-HH}$ , descriptor values and model deviations.

| Catalyst              | deleted atoms                                | $r_H$ | $\Delta\Delta G^\ddagger_{HE-HH}$<br>kcal/mol | % $V_{Bur,open}$<br>(D6) | $\Delta\%V_{Bur,Zr}$<br>(D1) | $q_{ZrCl2}$ | Bondi vdW radius<br>(D8) | $\Delta\Delta G^\ddagger_{HE-HH}$ ,<br>QSAR<br>kcal/mol | $ \Delta _{exp-pred}$<br>kcal/mol | $ \Delta ^2_{exp-pred}$ |
|-----------------------|----------------------------------------------|-------|-----------------------------------------------|--------------------------|------------------------------|-------------|--------------------------|---------------------------------------------------------|-----------------------------------|-------------------------|
| <b>Training Set</b>   |                                              |       |                                               |                          |                              |             |                          |                                                         |                                   |                         |
| M21                   | 2-Me: far H                                  | 0.012 | -2.93                                         | 39.4                     | 8                            | 0.43973     | 170                      | -2.91                                                   | 0.02                              | 0.00                    |
| M7                    | 2-Me: far H                                  | 0.10  | -1.52                                         | 35.5                     | 15.4                         | 0.38406     | 170                      | -1.51                                                   | 0.02                              | 0.00                    |
| M1                    | 2-Me: far H                                  | 0.012 | -2.93                                         | 34.6                     | 12.8                         | 0.39032     | 120                      | -2.94                                                   | 0.01                              | 0.00                    |
| M3                    | 2-Me: far H                                  | 0.11  | -1.46                                         | 34.9                     | 13.3                         | 0.415       | 170                      | -1.46                                                   | 0.00                              | 0.00                    |
| M17                   | 2-Me: far H                                  | 0.34  | -0.71                                         | 34.7                     | 14.8                         | 0.42209     | 185                      | -0.77                                                   | 0.06                              | 0.00                    |
| M5                    | 2-Me: far H                                  | 0.22  | -1.00                                         | 34.6                     | 14.9                         | 0.41368     | 175                      | -1.06                                                   | 0.06                              | 0.00                    |
| M37                   | 2-Et: far Me                                 | 0.2   | -1.07                                         | 34.8                     | 16.2                         | 0.42189     | 170                      | -1.00                                                   | 0.07                              | 0.00                    |
| M11                   | 2-Me: far H                                  | 0.18  | -1.14                                         | 34.8                     | 16.1                         | 0.41192     | 170                      | -1.08                                                   | 0.06                              | 0.00                    |
| M15                   | 2-Me: far H                                  | 0.22  | -1.00                                         | 34.8                     | 16.3                         | 0.4139      | 170                      | -1.04                                                   | 0.04                              | 0.00                    |
| M31                   | 2-Me: far H                                  | 0.27  | -0.87                                         | 34.7                     | 14.9                         | 0.41091     | 185                      | -0.84                                                   | 0.03                              | 0.00                    |
| M9                    | 2-Me: far H                                  | 0.19  | -1.10                                         | 34.8                     | 16.3                         | 0.41178     | 170                      | -1.05                                                   | 0.05                              | 0.00                    |
| M23                   | 2-Me: far H                                  | 0.19  | -1.10                                         | 34.8                     | 16.3                         | 0.40469     | 170                      | -1.10                                                   | 0.00                              | 0.00                    |
| M29                   | 2-Me: far H                                  | 0.2   | -1.07                                         | 35.4                     | 16.2                         | 0.39728     | 170                      | -1.29                                                   | 0.22                              | 0.05                    |
| M19                   | 2-Me: far H                                  | 0.3   | -0.80                                         | 34.9                     | 17.6                         | 0.41418     | 170                      | -0.88                                                   | 0.08                              | 0.01                    |
| M27                   | 2-Me: far H                                  | 0.19  | -1.10                                         | 34.7                     | 16                           | 0.40457     | 170                      | -1.12                                                   | 0.02                              | 0.00                    |
| M35                   | 2-Me: far H                                  | 0.32  | -0.75                                         | 34.8                     | 17.9                         | 0.418       | 170                      | -0.79                                                   | 0.04                              | 0.00                    |
| M25                   | 2-Me: far H                                  | 0.21  | -1.03                                         | 34.8                     | 16.2                         | 0.40338     | 170                      | -1.12                                                   | 0.09                              | 0.01                    |
| M33                   | 2-Me: far H                                  | 0.14  | -1.30                                         | 34.8                     | 16.7                         | 0.39839     | 170                      | -1.09                                                   | 0.21                              | 0.04                    |
| M39                   | 2-Me: far H                                  | 0.18  | -1.14                                         | 34.8                     | 16.8                         | 0.40132     | 170                      | -1.06                                                   | 0.08                              | 0.01                    |
| M13                   | 2-Me: far H                                  | 0.18  | -1.14                                         | 35                       | 16.9                         | 0.40703     | 170                      | -1.04                                                   | 0.09                              | 0.01                    |
| <b>Validation Set</b> |                                              |       |                                               |                          |                              |             |                          |                                                         |                                   |                         |
| M18                   | 2-Me: far H                                  | 0.11  | -1.5                                          | 35.5                     | 15.3                         | 0.38582     | 170                      | -1.51                                                   | 0.05                              | 0.00                    |
| M8                    | 2-Me: far H                                  | 0.14  | -1.3                                          | 36.2                     | 15.0                         | 0.3909      | 170                      | -1.66                                                   | 0.35                              | 0.13                    |
| M22                   | 2-Me: far H                                  | 0.14  | -1.3                                          | 34.9                     | 13.1                         | 0.41691     | 170                      | -1.47                                                   | 0.17                              | 0.03                    |
| M6                    | 2-Me: far H                                  | 0.33  | -0.7                                          | 34.7                     | 14.8                         | 0.42025     | 185                      | -0.78                                                   | 0.05                              | 0.00                    |
| M4                    | 2-Me: far H                                  | 0.18  | -1.1                                          | 34.7                     | 15.3                         | 0.41789     | 170                      | -1.13                                                   | 0.01                              | 0.00                    |
| M10                   | 2-Me: far H                                  | 0.21  | -1.0                                          | 34.7                     | 16.1                         | 0.4117      | 170                      | -1.06                                                   | 0.03                              | 0.00                    |
| M12                   | 2-Me: far H                                  | 0.19  | -1.1                                          | 34.8                     | 16.3                         | 0.41332     | 170                      | -1.04                                                   | 0.06                              | 0.00                    |
| M2                    | 2-Me: far H                                  | 0.2   | -1.1                                          | 34.8                     | 16.2                         | 0.41191     | 170                      | -1.07                                                   | 0.00                              | 0.00                    |
| M16                   | 2-Me: far H                                  | 0.22  | -1.0                                          | 34.7                     | 16.8                         | 0.41509     | 170                      | -0.94                                                   | 0.06                              | 0.00                    |
| M26                   | 2-Me: far H                                  | 0.21  | -1.0                                          | 34.7                     | 16.3                         | 0.4118      | 170                      | -1.03                                                   | 0.00                              | 0.00                    |
| M14                   | 2-Me: far H                                  | 0.19  | -1.1                                          | 34.8                     | 16.8                         | 0.40819     | 170                      | -1.01                                                   | 0.09                              | 0.01                    |
| M20                   | 2-Me: far H                                  | 0.28  | -0.8                                          | 34.9                     | 17.65                        | 0.39857     | 170                      | -0.98                                                   | 0.14                              | 0.02                    |
| M32                   | 2-Me: far H                                  | 0.15  | -1.3                                          | 34.7                     | 15.2                         | 0.40988     | 170                      | -1.19                                                   | 0.06                              | 0.00                    |
| M24                   | 2-Me: far H                                  | 0.18  | -1.1                                          | 34.8                     | 16.2                         | 0.40385     | 170                      | -1.12                                                   | 0.01                              | 0.00                    |
| M38                   | 2-Me: far H                                  | 0.26  | -0.9                                          | 34.4                     | 18.2                         | 0.41882     | 155                      | -1.06                                                   | 0.17                              | 0.03                    |
| M34                   | 2-Me: far H                                  | 0.24  | -0.9                                          | 35                       | 17.7                         | 0.40482     | 170                      | -0.95                                                   | 0.01                              | 0.00                    |
| M30                   | 2-Me: far H                                  | 0.25  | -0.9                                          | 34.8                     | 17.6                         | 0.39993     | 170                      | -0.96                                                   | 0.04                              | 0.00                    |
| M36                   | 2-iPr: far H, far Me, 2 far H<br>on close Me | 0.21  | -1.0                                          | 34.3                     | 11.4                         | 0.43049     | 170                      | -1.49                                                   | 0.45                              | 0.20                    |
| M40                   | 2-Me: far H                                  | 0.17  | -1.2                                          | 35                       | 16.8                         | 0.40985     | 170                      | -1.04                                                   | 0.13                              | 0.02                    |
| M28                   | 2-Me: far H                                  | 0.002 | -4.1                                          | 40.1                     | 5.2                          | 0.41495     | 170                      | -3.60                                                   | 0.51                              | 0.26                    |

**Table S9.** Mean average deviation (MAD), mean squared error (MSE) and root mean squared error (RMSE) for  $\Delta\Delta G^{\ddagger}_{\text{EH-EE, QSAR}}$ .

|      | Test Set                                 |      | Validation Set                           |
|------|------------------------------------------|------|------------------------------------------|
| MAD  | 0.06 kcal/mol                            | MAD  | 0.12 kcal/mol                            |
| MSE  | 0.01 kcal <sup>2</sup> /mol <sup>2</sup> | MSE  | 0.04 kcal <sup>2</sup> /mol <sup>2</sup> |
| RMSE | 0.09 kcal/mol                            | RMSE | 0.19 kcal/mol                            |

QSAR Modeling –  $r_H$  model, Analysis of Variance

|                              |                     |                       |               |                |                       |                  |                    |                    |
|------------------------------|---------------------|-----------------------|---------------|----------------|-----------------------|------------------|--------------------|--------------------|
| SUMMARY OUTPUT               |                     |                       |               |                |                       |                  |                    |                    |
| <i>Regression Statistics</i> |                     |                       |               |                |                       |                  |                    |                    |
| Multiple R                   | 0.989579            |                       |               |                |                       |                  |                    |                    |
| R Square                     | 0.979267            |                       |               |                |                       |                  |                    |                    |
| Adjusted R Square            | 0.973738            |                       |               |                |                       |                  |                    |                    |
| Standard Error               | 0.098241            |                       |               |                |                       |                  |                    |                    |
| Observations                 | 20                  |                       |               |                |                       |                  |                    |                    |
| <i>ANOVA</i>                 |                     |                       |               |                |                       |                  |                    |                    |
|                              | <i>df</i>           | <i>SS</i>             | <i>MS</i>     | <i>F</i>       | <i>Significance F</i> |                  |                    |                    |
| Regression                   | 4                   | 6.837771              | 1.709443      | 177.1213       | 1.98E-12              |                  |                    |                    |
| Residual                     | 15                  | 0.144769              | 0.009651      |                |                       |                  |                    |                    |
| Total                        | 19                  | 6.98254               |               |                |                       |                  |                    |                    |
|                              |                     |                       |               |                |                       |                  |                    |                    |
|                              | <i>Coefficients</i> | <i>Standard Error</i> | <i>t Stat</i> | <i>P-value</i> | <i>Lower 95%</i>      | <i>Upper 95%</i> | <i>Lower 95.0%</i> | <i>Upper 95.0%</i> |
| Intercept                    | -3.55349            | 1.562412              | -2.27436      | 0.038062       | -6.88369              | -0.22328         | -6.88369           | -0.22328           |
| X Variable                   | -0.20133            | 0.036663              | -5.49132      | 6.21E-05       | -0.27948              | -0.12318         | -0.27948           | -0.12318           |
| X Variable                   | 0.135321            | 0.018416              | 7.348071      | 2.41E-06       | 0.096069              | 0.174574         | 0.096069           | 0.174574           |
| X Variable                   | 6.943083            | 2.433881              | 2.85268       | 0.012101       | 1.755388              | 12.13078         | 1.755388           | 12.13078           |
| X Variable                   | 0.026132            | 0.002265              | 11.53582      | 7.4E-09        | 0.021304              | 0.03096          | 0.021304           | 0.03096            |

QSAR Modeling –  $r_H$  model, Leave-One-Out Analysis

**Table S10.** LOOCV analysis stereoselectivity model.

|    | Catalyst | Yintercept | slopeA   | slopeB   | slopeC   | slopeD   | redictedEX                                                                                                 | actualEXP | $R^2$       | adj. $R^2$ | $ \Delta $   | $\Delta^2$ | $ \text{alEXP-MEAN} ^2$ |
|----|----------|------------|----------|----------|----------|----------|------------------------------------------------------------------------------------------------------------|-----------|-------------|------------|--------------|------------|-------------------------|
| 1  | M21      | -11.2676   | -0.00991 | 0.123539 | 10.50907 | 0.024812 | -1.83052                                                                                                   | -2.93     | 0.969281    | 0.960504   | 1.099        | 1.209      | 2.796                   |
| 2  | M7       | -3.44189   | -0.2001  | 0.134457 | 6.493382 | 0.026387 | -1.49504                                                                                                   | -1.52     | 0.978879    | 0.972844   | 0.025        | 0.001      | 0.069                   |
| 3  | M1       | -4.70298   | -0.18583 | 0.143139 | 6.896781 | 0.029048 | -3.12291                                                                                                   | -2.93     | 0.964475    | 0.954324   | 0.193        | 0.037      | 2.796                   |
| 4  | M3       | -3.47436   | -0.20323 | 0.134291 | 6.908543 | 0.026234 | -1.45418                                                                                                   | -1.46     | 0.978927    | 0.972906   | 0.006        | 0.000      | 0.041                   |
| 5  | M17      | -3.78418   | -0.1908  | 0.139835 | 6.62577  | 0.025637 | -0.79572                                                                                                   | -0.71     | 0.978844    | 0.972796   | 0.086        | 0.007      | 0.300                   |
| 6  | M5       | -3.75829   | -0.19463 | 0.138237 | 6.822015 | 0.025955 | -1.06841                                                                                                   | -1        | 0.979408    | 0.973525   | 0.068        | 0.005      | 0.067                   |
| 7  | M37      | -3.72252   | -0.20445 | 0.136931 | 7.690251 | 0.025846 | -0.98077                                                                                                   | -1.07     | 0.979876    | 0.974126   | 0.089        | 0.008      | 0.035                   |
| 8  | M11      | -3.53899   | -0.20323 | 0.135361 | 7.070655 | 0.026143 | -1.07513                                                                                                   | -1.14     | 0.979572    | 0.973736   | 0.065        | 0.004      | 0.014                   |
| 9  | M15      | -3.44911   | -0.20213 | 0.133972 | 6.730942 | 0.026301 | -1.04234                                                                                                   | -1        | 0.979078    | 0.973101   | 0.042        | 0.002      | 0.067                   |
| 10 | M31      | -3.26626   | -0.20793 | 0.131388 | 6.729214 | 0.026691 | -0.82089                                                                                                   | -0.87     | 0.978822    | 0.972771   | 0.049        | 0.002      | 0.151                   |
| 11 | M9       | -3.55491   | -0.20252 | 0.135568 | 7.039603 | 0.026142 | -1.0499                                                                                                    | -1.1      | 0.979309    | 0.973397   | 0.050        | 0.003      | 0.025                   |
| 12 | M23      | -3.50624   | -0.2024  | 0.13474  | 6.906196 | 0.026213 | -1.1025                                                                                                    | -1.1      | 0.978975    | 0.972968   | 0.002        | 0.000      | 0.025                   |
| 13 | M29      | -3.19614   | -0.22867 | 0.127714 | 8.833254 | 0.025731 | -1.3387                                                                                                    | -1.07     | 0.987377    | 0.98377    | 0.269        | 0.072      | 0.035                   |
| 14 | M19      | -2.9824    | -0.20997 | 0.127551 | 6.325972 | 0.026717 | -0.90347                                                                                                   | -0.8      | 0.979621    | 0.973799   | 0.103        | 0.011      | 0.210                   |
| 15 | M27      | -3.54163   | -0.20186 | 0.134954 | 6.949021 | 0.02618  | -1.12495                                                                                                   | -1.1      | 0.979058    | 0.973074   | 0.025        | 0.001      | 0.025                   |
| 16 | M35      | -3.12771   | -0.20674 | 0.129715 | 6.368748 | 0.026617 | -0.8134                                                                                                    | -0.75     | 0.97863     | 0.972524   | 0.063        | 0.004      | 0.258                   |
| 17 | M25      | -3.574     | -0.20289 | 0.134465 | 7.159081 | 0.026098 | -1.13159                                                                                                   | -1.03     | 0.980277    | 0.974641   | 0.102        | 0.010      | 0.052                   |
| 18 | M33      | -3.44061   | -0.19349 | 0.138204 | 5.726707 | 0.026583 | -1.06549                                                                                                   | -1.3      | 0.986027    | 0.982034   | 0.235        | 0.055      | 0.002                   |
| 19 | M39      | -3.54713   | -0.19891 | 0.136706 | 6.622959 | 0.026263 | -1.04988                                                                                                   | -1.14     | 0.980065    | 0.974369   | 0.090        | 0.008      | 0.014                   |
| 20 | M13      | -3.77984   | -0.19579 | 0.139153 | 6.925023 | 0.026042 | -1.03503                                                                                                   | -1.14     | 0.980426    | 0.974833   | 0.105        | 0.011      | 0.014                   |
|    |          |            |          |          |          |          | <b>MEAN</b>                                                                                                |           |             |            | <b>MAD</b>   |            | <b>MSE</b>              |
|    |          |            |          |          |          |          | <b>-1.26</b>                                                                                               |           |             |            | <b>0.138</b> |            | <b>0.072</b>            |
|    |          |            |          |          |          |          | <b>MAX</b>                                                                                                 |           |             |            |              |            |                         |
|    |          |            |          |          |          |          | <b>-0.71</b>                                                                                               |           |             |            |              |            |                         |
|    |          |            |          |          |          |          | <b>MIN</b>                                                                                                 |           |             |            |              |            |                         |
|    |          |            |          |          |          |          | <b>-2.93</b>                                                                                               |           |             |            |              |            |                         |
|    |          |            |          |          |          |          | $q^2 = \frac{\sum(\text{actualEXP} - \text{MEAN}) - \sum(\Delta^2)}{\sum(\text{actualEXP} - \text{MEAN})}$ |           |             |            |              |            |                         |
|    |          |            |          |          |          |          | $q^2$                                                                                                      |           | <b>0.79</b> |            |              |            |                         |

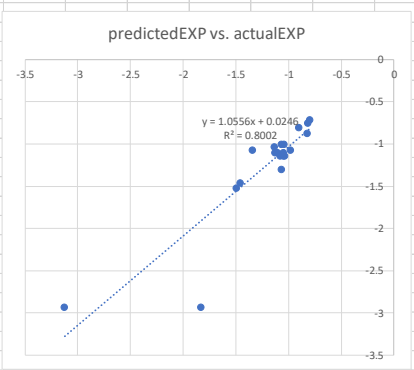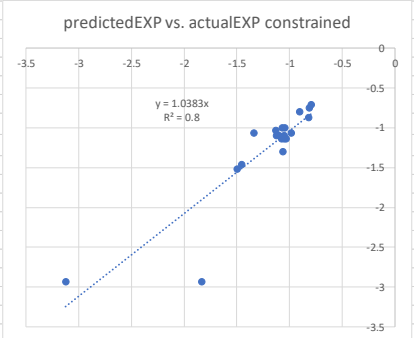

### 3. Lack of Correlation between Performance Indicators in Homo- and Copolymerization

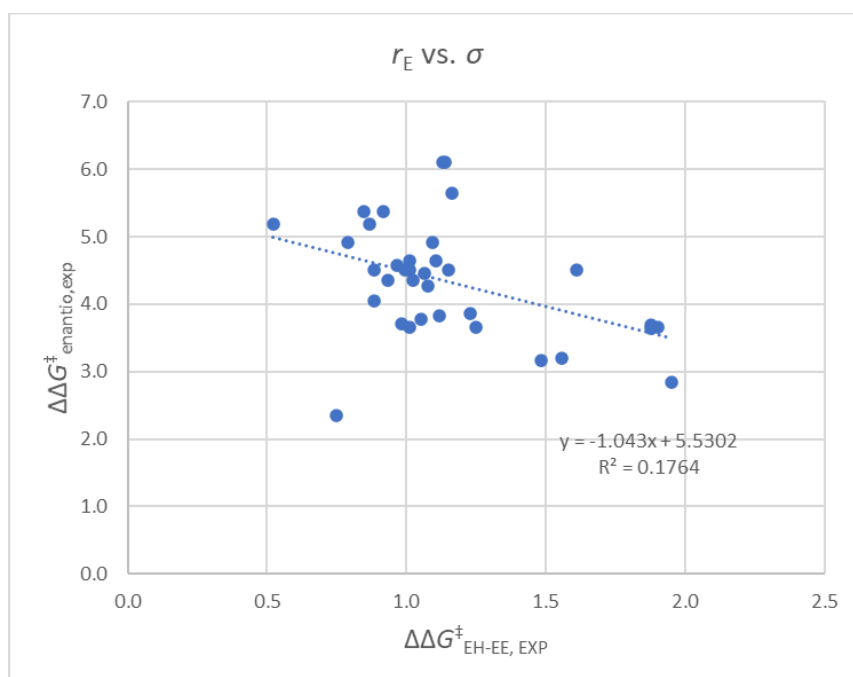

**Figure S1.** Correlation of enantioselectivity in iPP polymerization and reactivity ratio  $r_E$ . In terms of  $\Delta\Delta G^\ddagger$ .

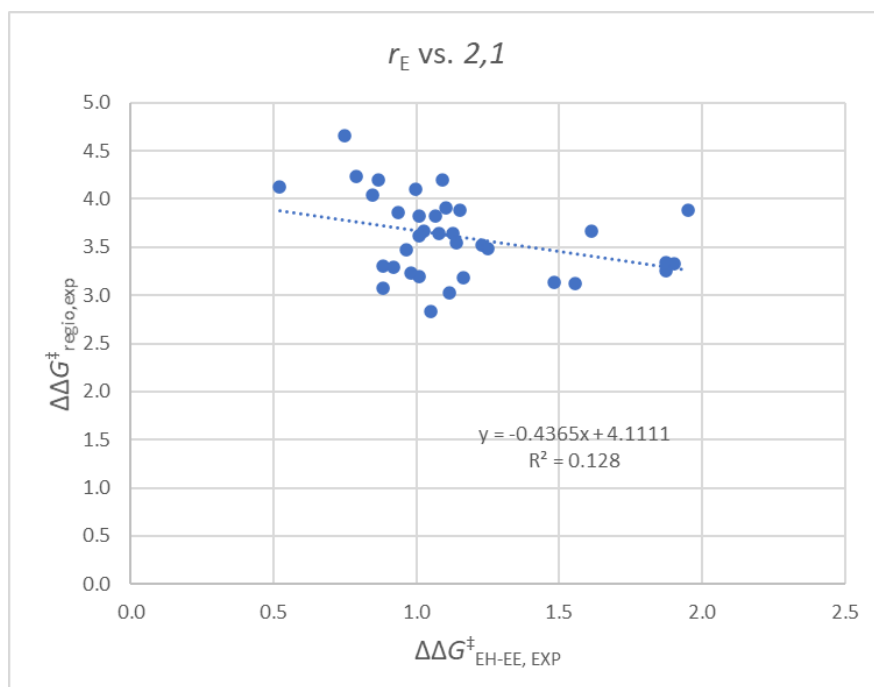

**Figure S2.** Correlation of regioselectivity in iPP polymerization and reactivity ratio  $r_E$ . In terms of  $\Delta\Delta G^\ddagger$ .



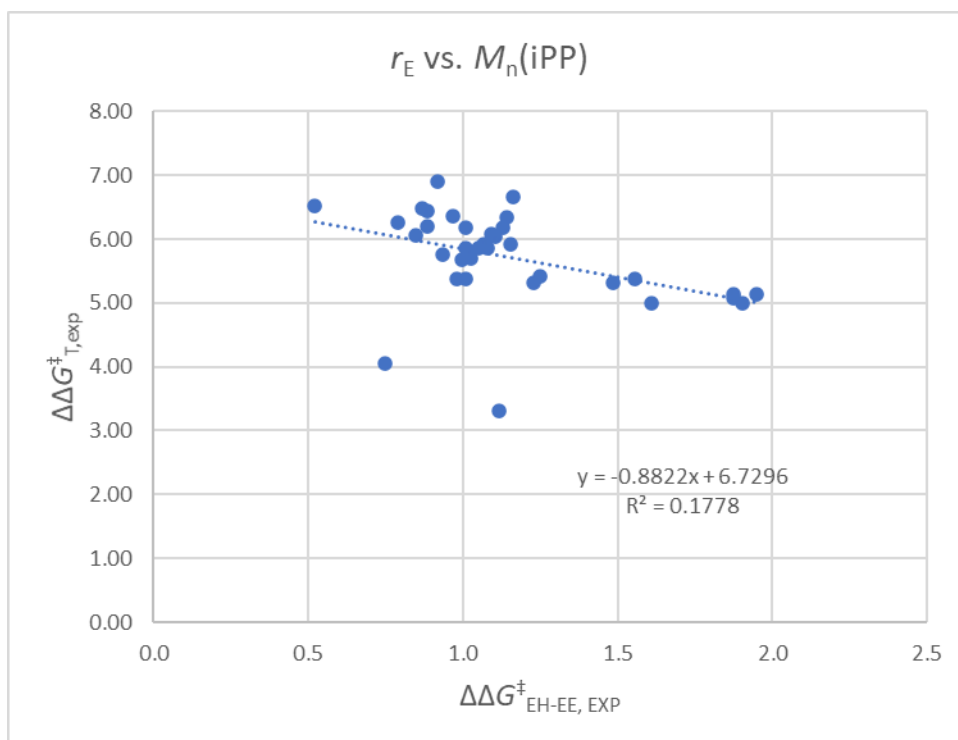

**Figure S3.** Correlation of molar mass capability in iPP polymerization and reactivity ratio  $r_E$ . In terms of  $\Delta\Delta G^\ddagger$ .

#### 4. Full Gaussian Citation

Gaussian 16, Revision A.03, Frisch, M. J.; Trucks, G. W.; Schlegel, H. B.; Scuseria, G. E.; Robb, M. A.; Cheeseman, J. R.; Scalmani, G.; Barone, V.; Petersson, G. A.; Nakatsuji, H.; Li, X.; Caricato, M.; Marenich, A. V.; Bloino, J.; Janesko, B. G.; Gomperts, R.; Mennucci, B.; Hratchian, H. P.; Ortiz, J. V.; Izmaylov, A. F.; Sonnenberg, J. L.; Williams-Young, D.; Ding, F.; Lipparini, F.; Egidi, F.; Goings, J.; Peng, B.; Petrone, A.; Henderson, T.; Ranasinghe, D.; Zakrzewski, V. G.; Gao, J.; Rega, N.; Zheng, G.; Liang, W.; Hada, M.; Ehara, M.; Toyota, K.; Fukuda, R.; Hasegawa, J.; Ishida, M.; Nakajima, T.; Honda, Y.; Kitao, O.; Nakai, H.; Vreven, T.; Throssell, K.; Montgomery, J. A., Jr.; Peralta, J. E.; Ogliaro, F.; Bearpark, M. J.; Heyd, J. J.; Brothers, E. N.; Kudin, K. N.; Staroverov, V. N.; Keith, T. A.; Kobayashi, R.; Normand, J.; Raghavachari, K.; Rendell, A. P.; Burant, J. C.; Iyengar, S. S.; Tomasi, J.; Cossi, M.; Millam, J. M.; Klene, M.; Adamo, C.; Cammi, R.; Ochterski, J. W.; Martin, R. L.; Morokuma, K.; Farkas, O.; Foresman, J. B.; Fox, D. J. Gaussian, Inc., Wallingford CT, 2016.
